# Supplementary material
Source: PubMed Central journal article supplement (PMC7745982)

Figure 3c

CA 2/21/19

8/8

Cas9

MSK-LX369  
Cas9

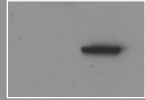

180

Actin

JHU-LX102 actin  
SCRX-Lu149 actin

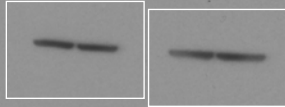

40

JHU-LX55a actin  
MSK-LX369 actin  
MSK-LX29 actin  
MSK-LX278 actin

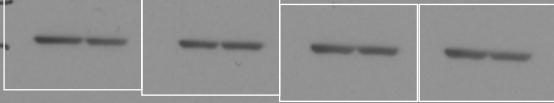

40

CH 3 2/21/19

5/8

Cas9

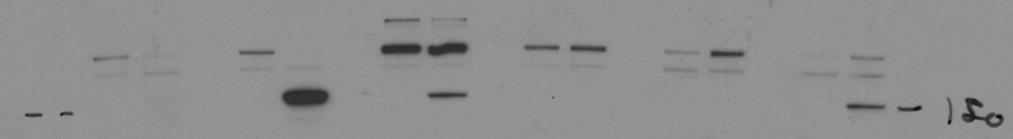

MSK-LX29  
Cas9

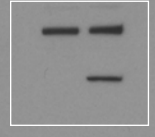

SCRX-Lu149  
Cas9

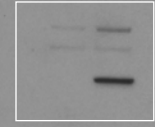

ActR

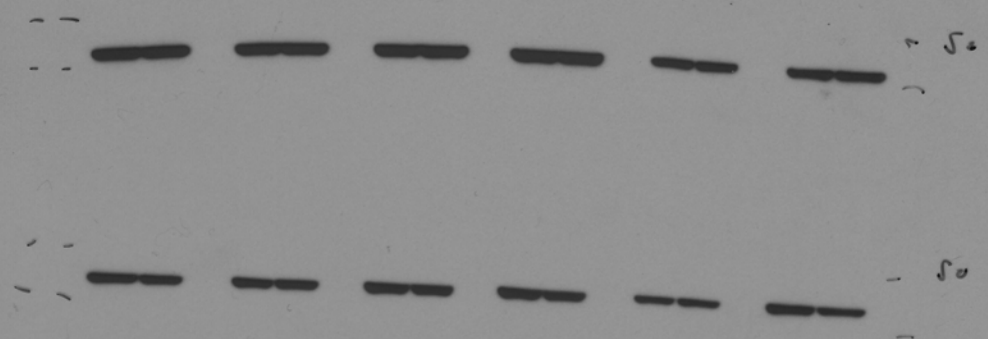

2/21/14

4/8

Cas9 PDAs

Cas9

150

JHU-LX55a  
Cas9

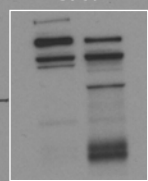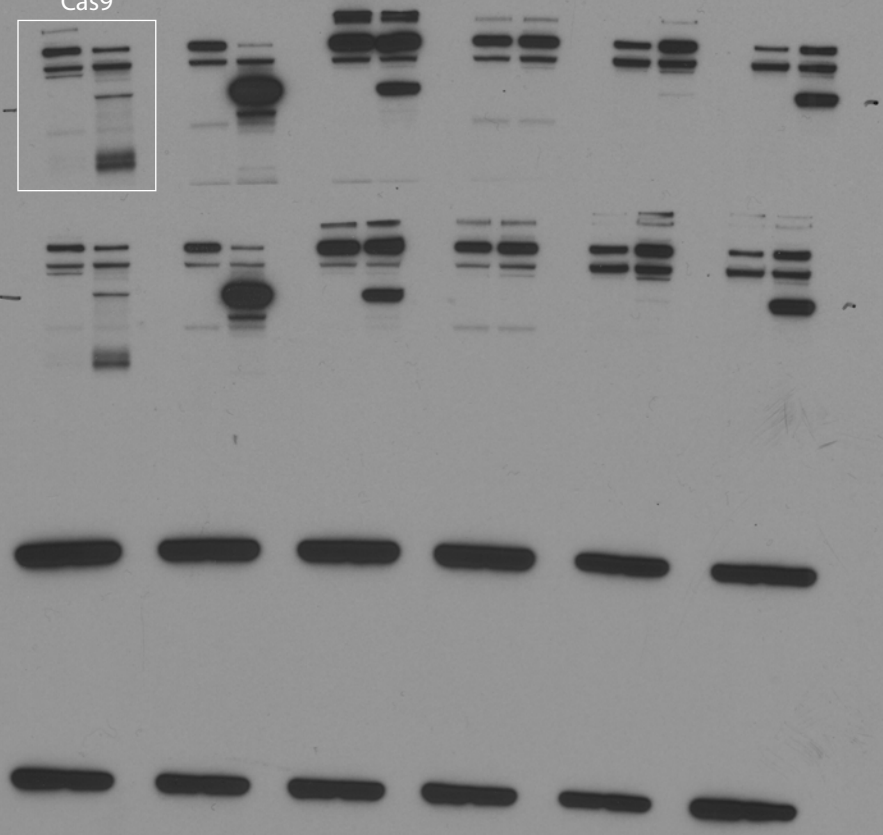

CH 2/21/19

4/8

Cas9

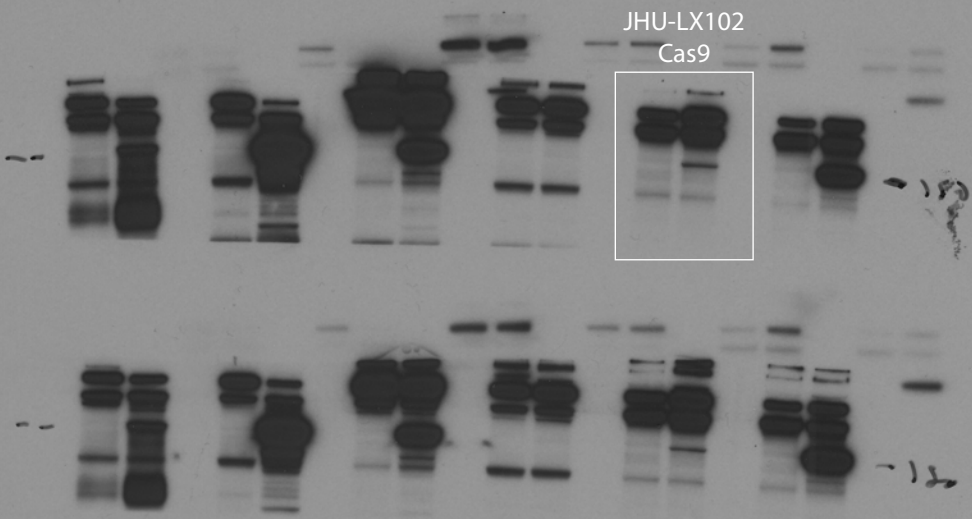

Shadow

Cas 1

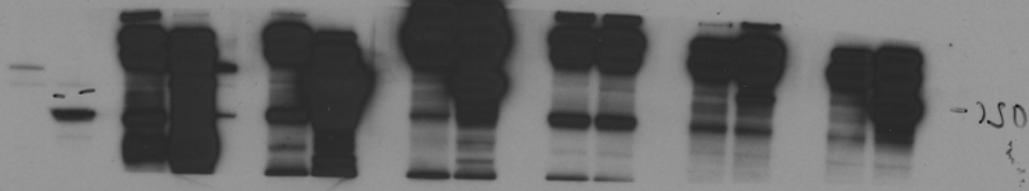

MSK-LX278  
Cas9

Cas 2

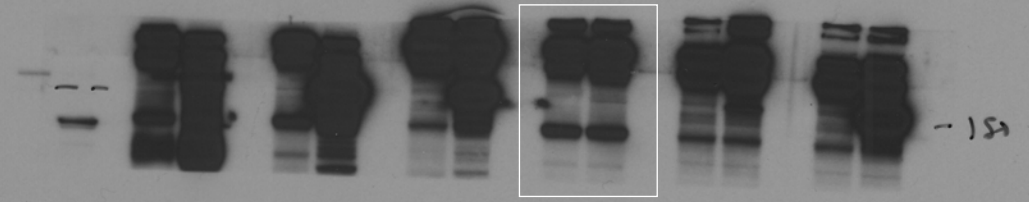

Supplement: NIHMS1643956-supplement-Figure_3_westerns.pdf [file NIHMS1643956-supplement-Figure_3_westerns.pdf]
