# Supplementary material
Source: PubMed Central journal article supplement (PMC7745982)

Figure 1d

Actin

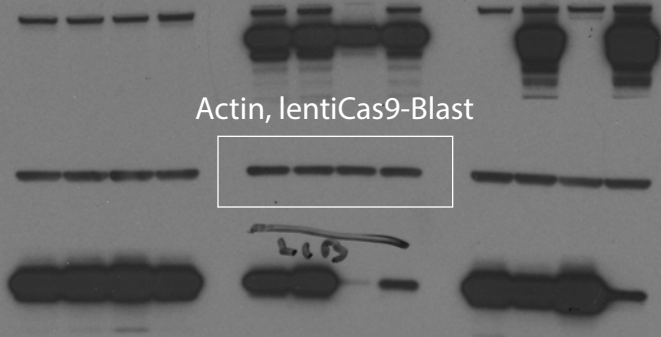

Actin

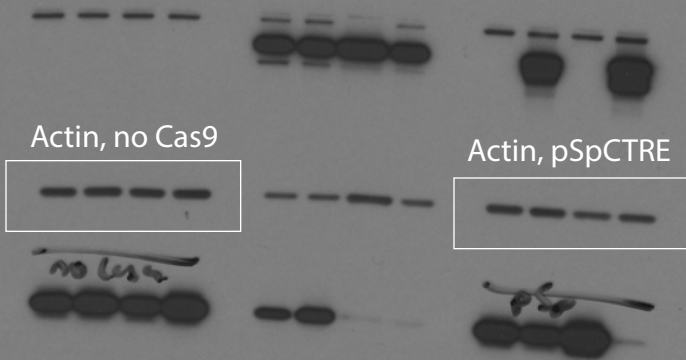

07/02/18  
AS47 pSpCTRE GFP K.O.

(1/4)

Cas9

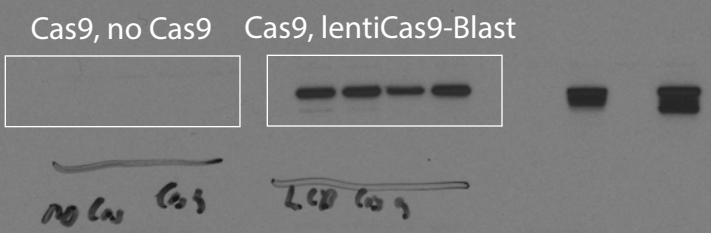

GFP

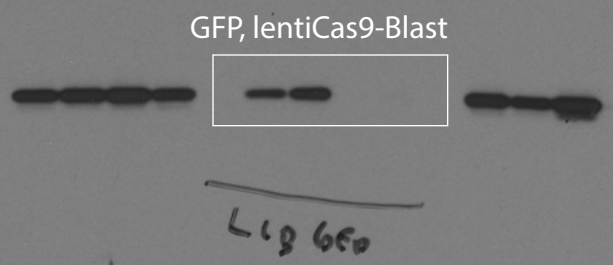

Cas9

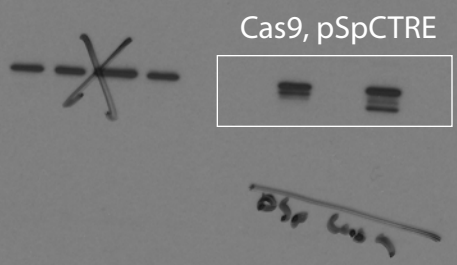

GFP

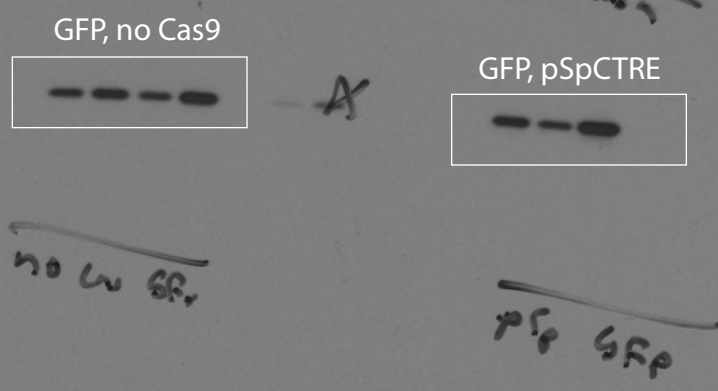

Supplement: NIHMS1643956-supplement-Figure_1_westerns.pdf [file NIHMS1643956-supplement-Figure_1_westerns.pdf]

Figure 2c

CA 8/10/16

ASMA pSPLTR6

dox dose response

1/5

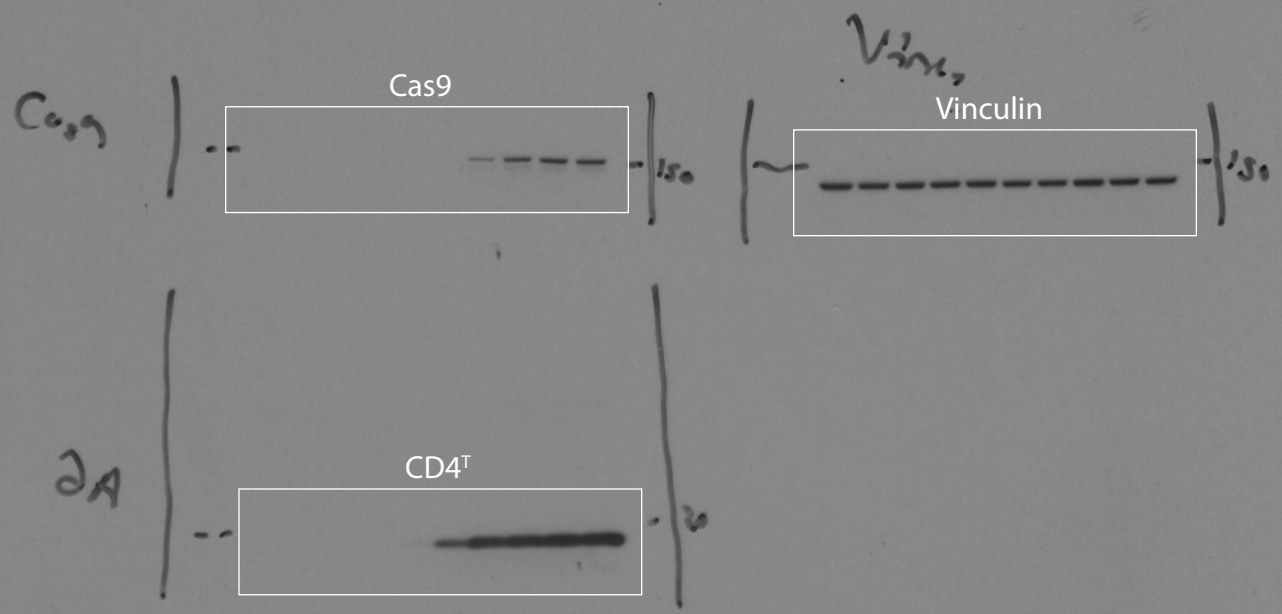

CH 8/10/18

3/5

Cas9

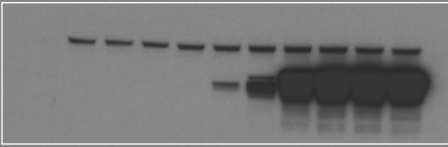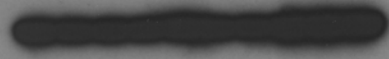

rtTA

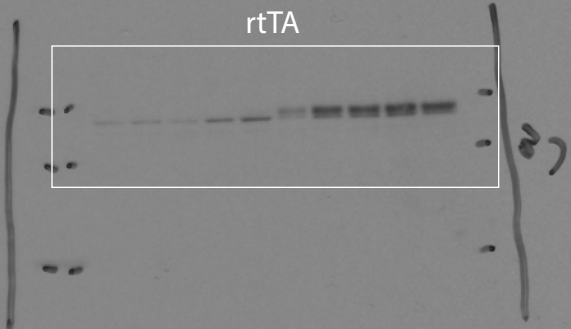

CD4<sup>T</sup>

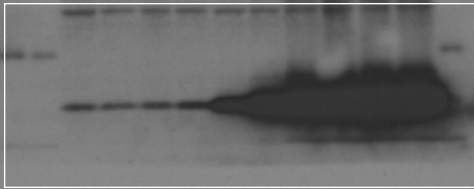

rtTA

Supplement: NIHMS1643956-supplement-Figure_2_westerns.pdf [file NIHMS1643956-supplement-Figure_2_westerns.pdf]

Figure 5b

CH 11/29/16

2/4

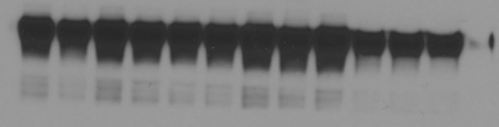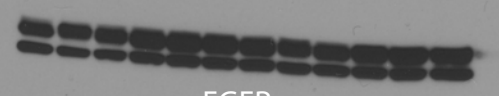

p-EGFR

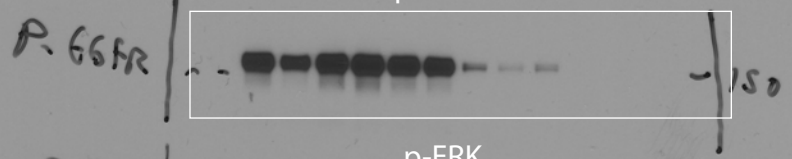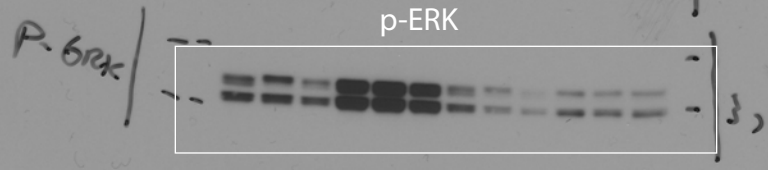

p-ERK

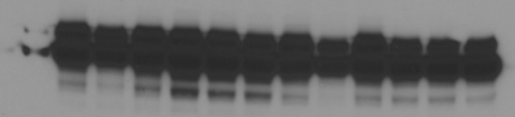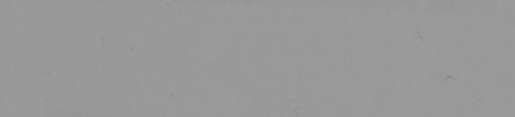

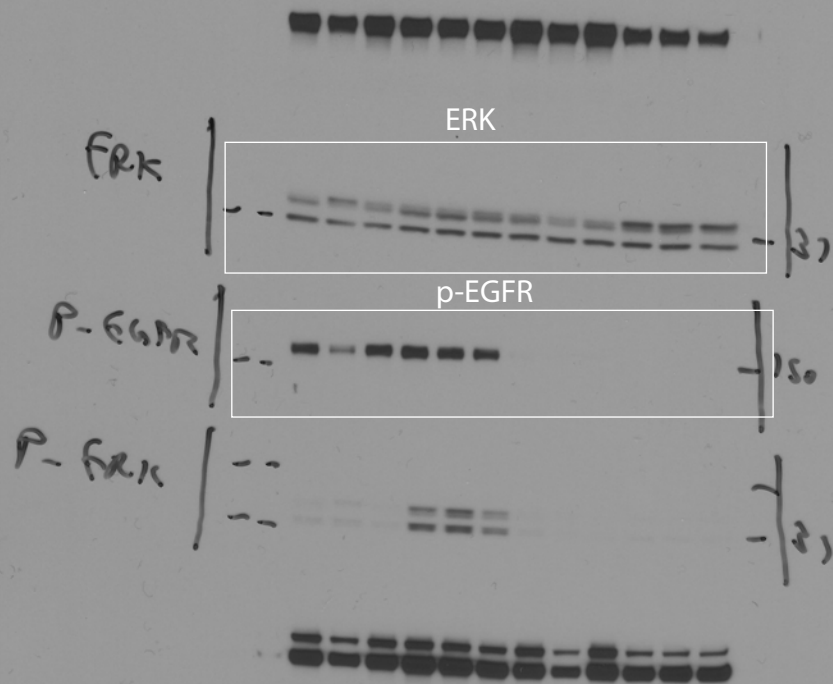

CA 10/2018

4/4

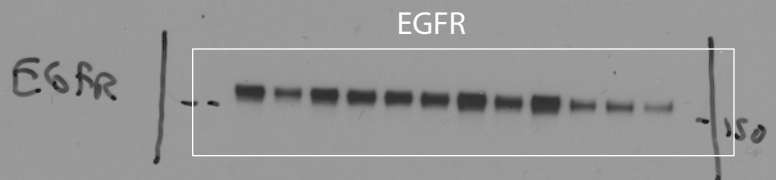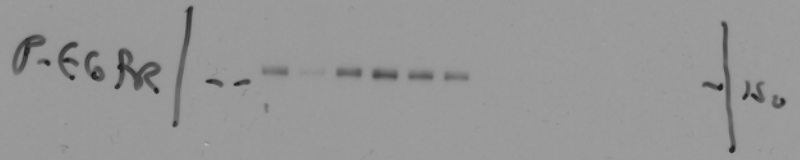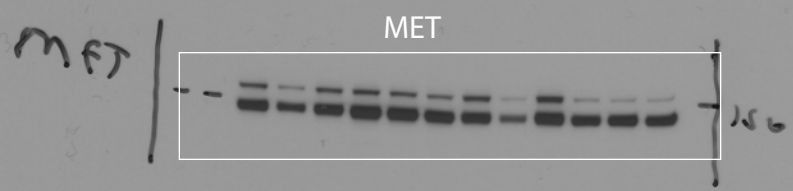

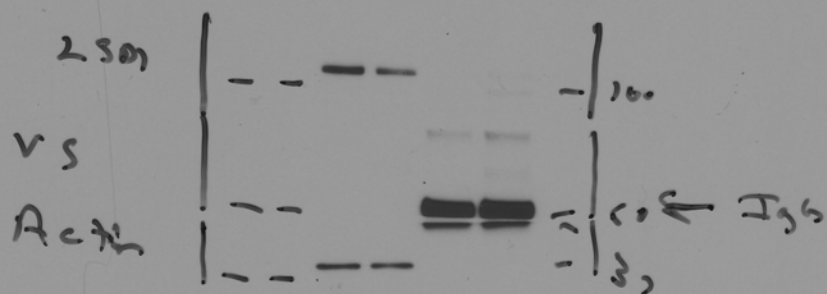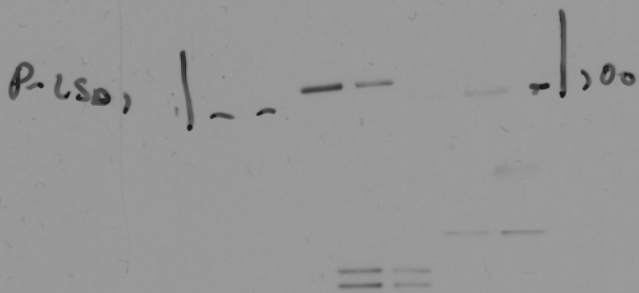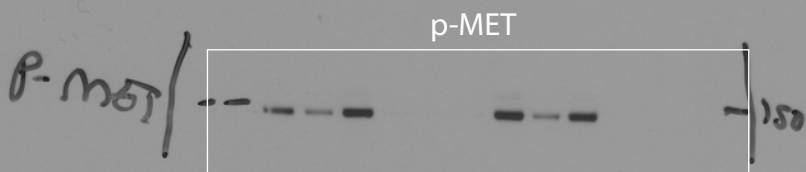

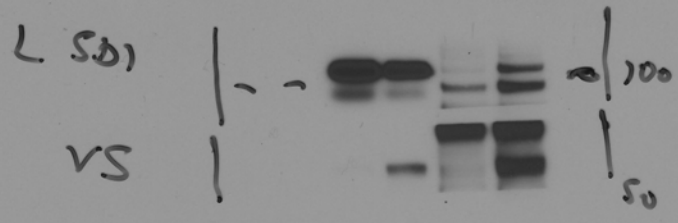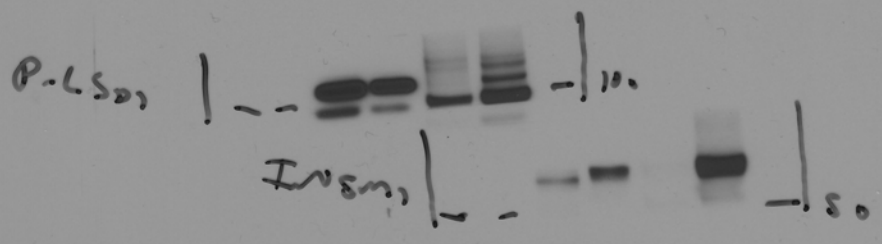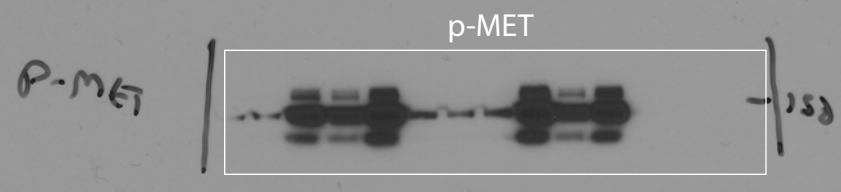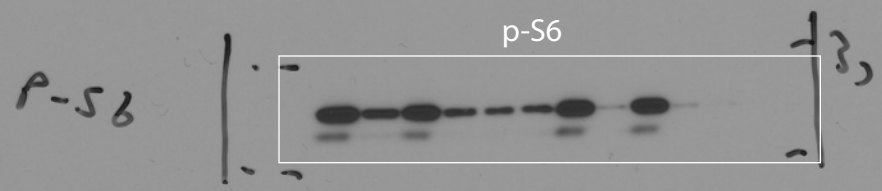

Supplement: NIHMS1643956-supplement-Figure_5_westerns.pdf [file NIHMS1643956-supplement-Figure_5_westerns.pdf]
